# Supplementary material
Source: PubMed Central journal article supplement (PMC4089967)
Supplement: NIHMS572504-supplement-01.pdf [file NIHMS572504-supplement-01.pdf]

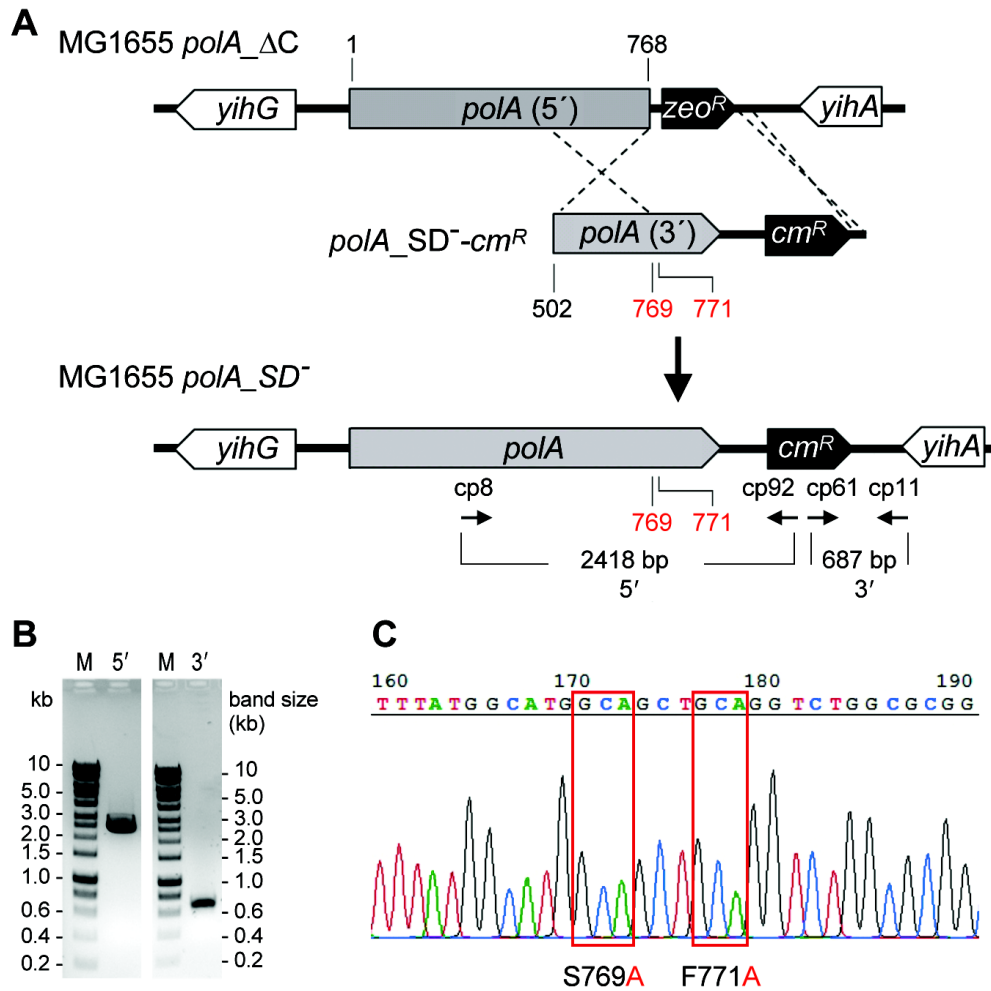

Suppl. Fig. 1

**Fig. S1.** Introduction of S769(AGT)→A769(GCA) and F771(TTC)→A771(GCA) mutations into chromosomal *polA* gene of *E. coli* MG1655. **A.** Codon replacement within the chromosomal *polA* gene done in two recombineering steps. First, the 3' *polA* region (codon 769 to the ochre stop codon) was replaced with a Zeo<sup>R</sup> cassette. In a second recombineering step, the *polA*<sub>SD<sup>-</sup></sub> ::*cat* allele replaced the Zeo<sup>R</sup> cassette and introduced the altered S769A (AGT → GCA) and F771A (TTC → GCA) codons into the *polA* locus. **B.** PCR-amplification of genomic fragments from MG1655 *polA*<sub>SD<sup>-</sup></sub> ::*cat* with primers cp8 and cp92 and cp61 and cp11 (Table 3) respectively, yielded fragments of 2418 bp and 687 bp characteristic for a successful *polA*<sub>SD<sup>-</sup></sub> ::*cat* insertion. M, DNA size markers. **C.** Trace DNA sequencing file displaying the intended AGT →GCA (Ser769) and TTC→GCA (F771) *polA* mutations in the genome of *E. coli* MG1655 *polA*<sub>SD<sup>-</sup></sub> ::*cat*.

**Supplementary Table 1: Plasmids used in this study**

| <b>Strain</b> | <b>Relevant Characteristics</b>                                                                                                                                                            | <b>Source or Reference</b> |
|---------------|--------------------------------------------------------------------------------------------------------------------------------------------------------------------------------------------|----------------------------|
| pRed/ET       | Red/ET expression plasmid; pSC101 based; Ap <sup>R</sup>                                                                                                                                   | Gene Bridges               |
| pSKpolAint    | pBluescript derivative with 3'-end of the wild-type <i>polA</i> gene and closely linked <i>cat</i> gene; Ap <sup>R</sup> , Cm <sup>R</sup>                                                 | [1]                        |
| pJM993        | pSKpolAint derivative: 3'- end of <i>polA</i> encodes S769(AGT)→A769 (GCA) and F771(TTC) → A771(GCA) point mutations and closely linked <i>cat</i> gene; Ap <sup>R</sup> , Cm <sup>R</sup> | This work                  |
| pGB2          | low-copy-number, pSC101-derived vector: Spc <sup>R</sup>                                                                                                                                   | [2]                        |
| pRW134        | pGB2 derivative expressing <i>umuD'</i> C from the native <i>umuDC</i> promoter; Spc <sup>R</sup>                                                                                          | [3]                        |
| pJM963        | pRW134 derivative expressing <i>umuD'</i> and <i>umuC_Y11A</i> from the native <i>umuDC</i> promoter: Spc <sup>R</sup>                                                                     | [4]                        |

**Supplementary Table 2: Oligonucleotides used in this study**

| <b>Name</b>        | <b>Sequence</b>                                                                   | <b>Source and Reference</b> |
|--------------------|-----------------------------------------------------------------------------------|-----------------------------|
| cp6                | 5'-CAGATGTCACCTTGCAGTTGC                                                          | BioSpring                   |
| cp8                | 5'-AATGGCAGCGAAGCTCGAGC                                                           | BioSpring                   |
| cp11               | 5'-GGCGGTAGACAGCAATATCG                                                           | BioSpring                   |
| cp61               | 5'-GGCTTCCATGTCGGCAGAATG                                                          | BioSpring                   |
| cp92               | 5'-TATCAACGGTGGTATATCCAG                                                          | BioSpring                   |
| p2                 | 5'-GTGACAGCTTATGTTGCTTACTTACGAAAAAAGGCAT<br>GTTTCAGGCGAATCTTACGCCCCGCCCTGCCACTC   | BioSpring                   |
| p3                 | 5'-AGCAACGCCGTAGCGCGAAAGCGATCAACTTTGGTCT<br>GATTTATGGCATGAATTAACCCTCACTAAAGGGCG   | BioSpring                   |
| P4                 | 5'-GTGACAGCTTATGTTGCTTACTTACGAAAAAAGGCAT<br>GTTTCAGGCGAATCTAGCACGGAGTTCATTAGGGCTC | BioSpring                   |
| polA-FD424         | 5'-CGGACTGGATACGCTGTATGC                                                          | Lofstrand/[1]               |
| polA-RD424         | 5'- CTTCCAGTACCTCTTCCGACG                                                         | Lofstrand/[1]               |
| polA-RBamHI        | 5'-GCTCGGATCCTTTAGTGCGCCTGATCCCAGT                                                | Lofstrand                   |
| polA_F2105         | 5'-GCCAGAGGATTATGTGATTGT                                                          | Lofstrand                   |
| SSP1               | 5'-ATGGTACGGACGTGCTT                                                              | Lofstrand                   |
| SSP1-27            | 5'-ATGGTACGGACGTGCTTTAGTCGTAA                                                     | Lofstrand                   |
| FLAPU              | 5'-UAGTCGTTAATCATTAGTACCAGTATCGACAG                                               | Lofstrand                   |
| XAG49 <sup>a</sup> | 5'-CTGTCGATACTGGTACTAATGAXTAACGACTAAAGCA<br>CGTCCGTACCAT                          | Lofstrand                   |

<sup>a</sup>:X denotes the location of the synthetic abasic site

## References

- [1] K. Makiela-Dzbenska, M. Jaszczur, M. Banach-Orlowska, P. Jonczyk, R.M. Schaaper, I.J. Fijalkowska, Role of *Escherichia coli* DNA polymerase I in chromosomal DNA replication fidelity, *Mol. Microbiol.* 74 (2009) 1114-1127.
- [2] G. Churchward, D. Belin, Y. Nagamine, A pSC101-derived plasmid which shows no sequence homology to other commonly used cloning vectors, *Gene* 31 (1984) 165-171.
- [3] E.S. Szekeres, R. Woodgate, C.W. Lawrence, Substitution of *mucAB* or *rumAB* for *umuDC* alters the relative frequencies of the two classes of mutations induced by a site-specific T-T cyclobutane dimer and the efficiency of translesion DNA synthesis, *J.Bacteriol.* 178 (1996) 2559-2563.
- [4] A. Vaisman, W. Kuban, J.P. McDonald, K. Karata, W. Yang, M.F. Goodman, R. Woodgate, Critical amino acids in *Escherichia coli* responsible for sugar discrimination and base-substitution fidelity, *Nucleic Acids Res.* 40 (2012) 6144-6157.
